# Supplementary material for: Stability of CeO2 nanoparticles from paints and stains: insights under controlled and environmental scenarios
Source: Royal Society of Chemistry journal article supplement (doi:10.1039/d2en00210h), 2022-01-01
Supplement: d2en00210h1.pdf [file d2en00210h1.pdf]

1 Supporting Information

2 **Stability of CeO<sub>2</sub> nanoparticles derived from paints and**  
3 **stains: insights under controlled and environmental**  
4 **scenarios**

5

6

7

8 IBRAHIM JREIJE, AGIL AZIMZADA, MADJID HADIOUI, KEVIN J. WILKINSON\*

9

10 Biophysical Environmental Chemistry Group, University of Montreal, P.O. Box 6128, Succ. Centre-  
11 Ville, Montreal, QC, Canada.

12

13

#### 14 **Effect of sample filtration**

15 Although the precipitation can be analyzed, unfiltered, suspended particles and aggregates may  
16 occasionally cause blockages in the ICP-MS introduction system. Given that we were mainly  
17 interested in quantifying the smaller (nano) particles, the effect of 0.45  $\mu\text{m}$  membrane filtration  
18 was examined for a natural sample. For a precipitation sample examined before and after  
19 filtration, filtration decreased background Ce concentrations by  $60 \pm 7\%$ , which was mainly  
20 attributed to the adsorption of dissolved Ce on the filters. The decrease of dissolved Ce actually  
21 led to a decrease in the size detection limit (SDL) and a small shift of the observed particle size  
22 distributions (PSD) to lower sizes. However, in spite of having a lower SDL after filtration, NP  
23 numbers decreased by  $55 \pm 15\%$ . Although this decrease was mainly attributed to the removal of  
24 large particles (i.e.  $>0.45 \mu\text{m}$ ), some losses of small Ce-containing NP were occurring to the filters  
25 via adsorption (**Fig. S1**).

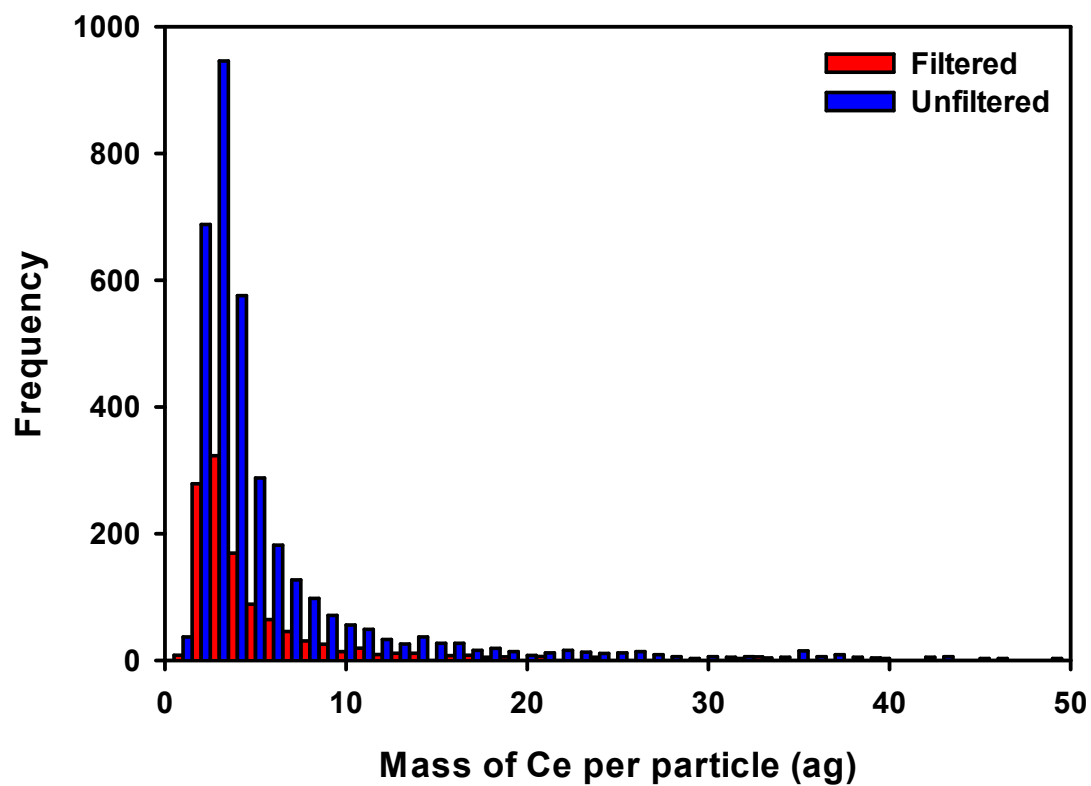

26

27 **Figure S1.** Mass distributions of Ce NP in a precipitation sample with or without filtration on a 0.45  $\mu\text{m}$   
28 PVDF membrane. Measurements were performed using SP-ICP-MS and a dwell time of 50  $\mu\text{s}$ .

29

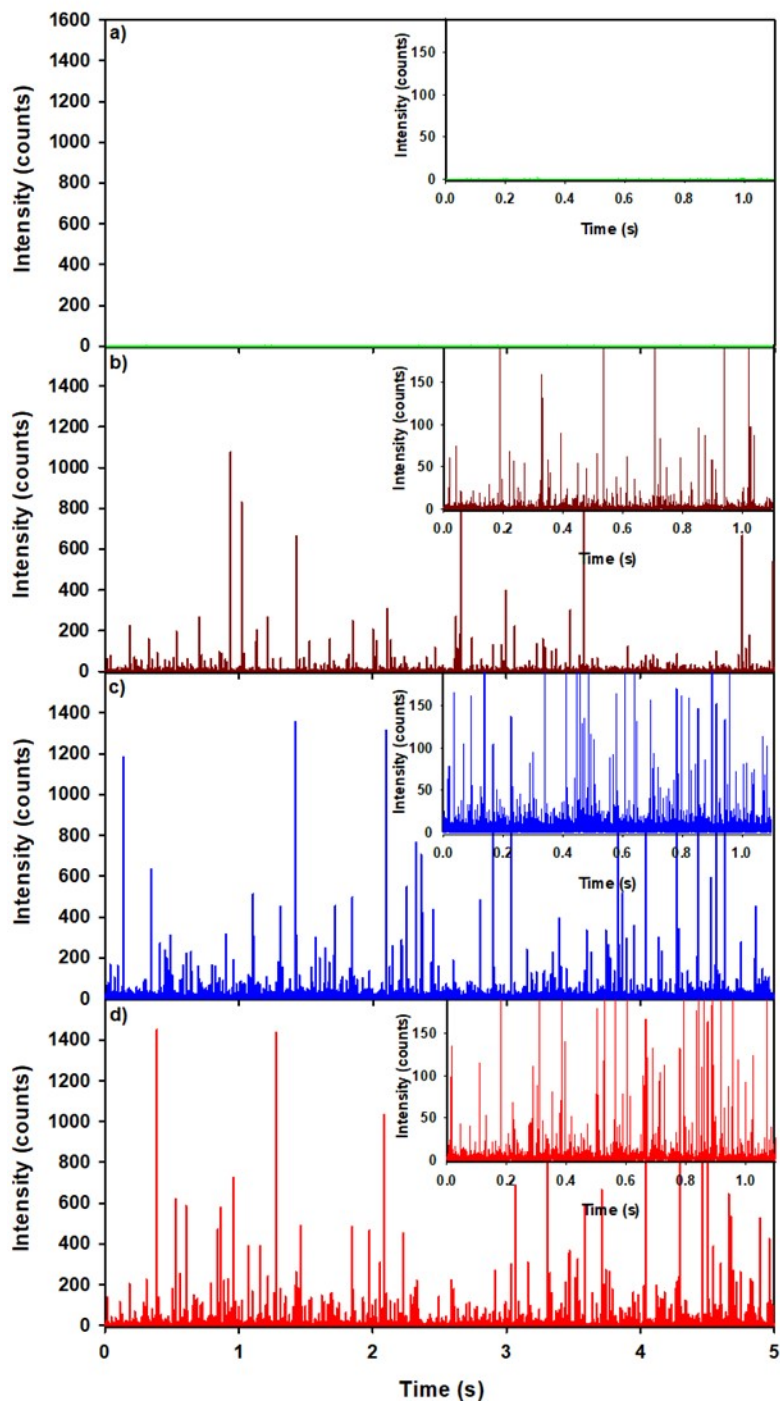

30

31 **Figure S2.** Time resolved signal (raw data) for  $^{140}\text{Ce}$  in (a) Milli-Q water; (b) precipitation, (c) paint and (d)  
 32 stain. Paint and stain were diluted 2500x. For better readability, only 5 s of data collection were shown,  
 33 using a total acquisition time of 50 s. Measurements were obtained using SP-ICP-MS with a 50  $\mu\text{s}$  dwell  
 34 time.

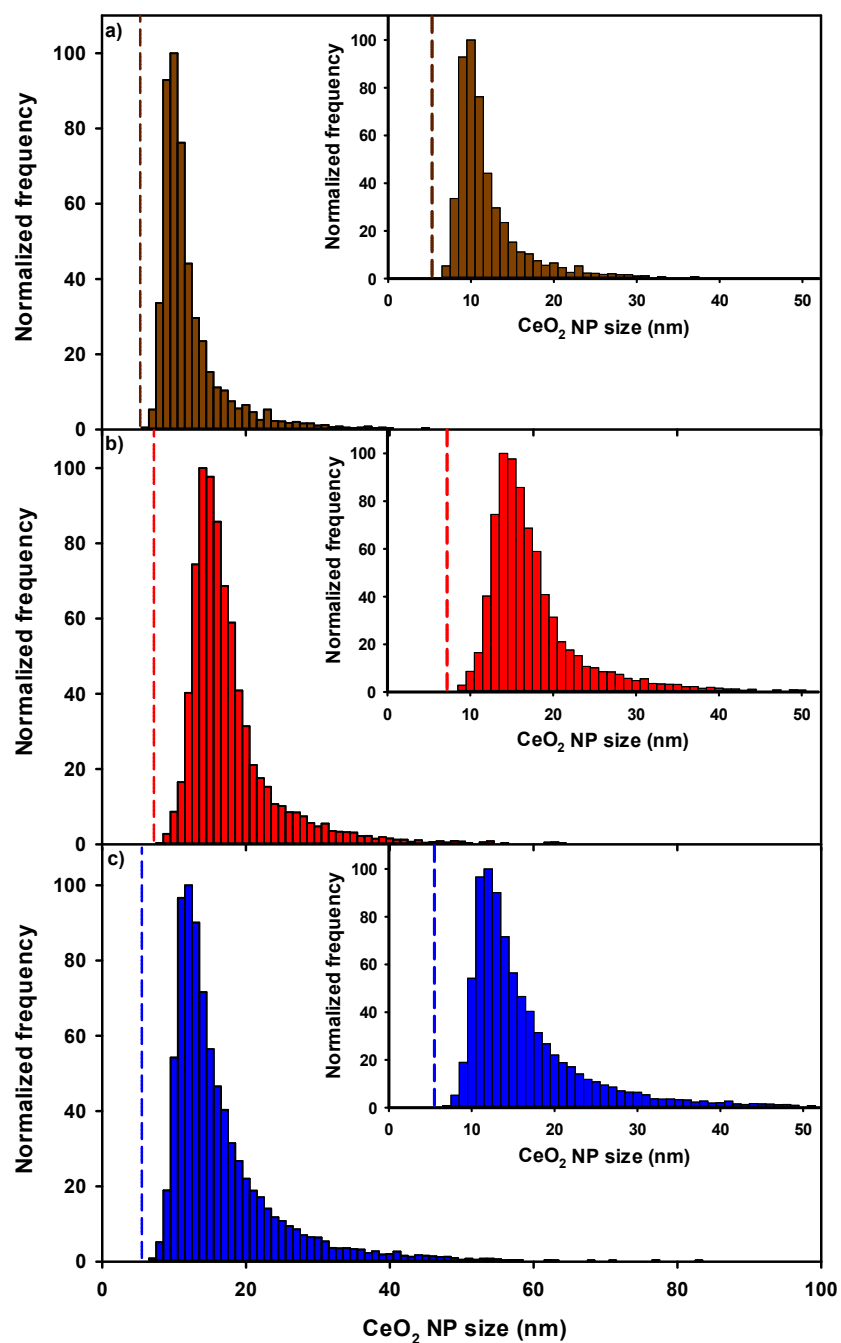

35

36 **Figure S3.** Calculated particle size distributions of Ce NP in (a) precipitation, (b) paint and (c) stain. Paint  
 37 and stain were diluted 2500x. NP sizes were calculated by assuming that the particles were spherical  $\text{CeO}_2$   
 38 particles with a density of  $7.13 \text{ kg} \cdot \text{dm}^{-3}$ . The dashed lines correspond to the calculated size detection  
 39 limits. Measurements were performed on a sector field SP-ICP-MS using a dwell time of  $50 \mu\text{s}$ .

40

41 **Table S1.** Ratios of Ce to La in precipitation, paint, and stain, determined with SP-ICP-MS with a dwell time  
 42 of 50  $\mu$ s. Paint and stain were diluted 2500x. Means and standard deviations were obtained from triplicate  
 43 samples.

| Sample        | Ce NPs / La NPs | Dissolved Ce / Dissolved La |
|---------------|-----------------|-----------------------------|
| Precipitation | 1.6 $\pm$ 0.6   | 2.7 $\pm$ 0.7               |
| Paint         | 26.7 $\pm$ 0.1  | 2.0 $\pm$ 0.3               |
| Stain         | 80.5 $\pm$ 11.1 | 3.2 $\pm$ 0.4               |

44

45 **Table S2.** Size detection limits for Ce in the blanks and samples analyzed with SP-ICP-MS with a dwell time  
 46 of 50  $\mu$ s. Paint and stain were diluted 2500x.

|               | Size detection limit (nm)                 |     |
|---------------|-------------------------------------------|-----|
|               | Milli-Q water                             | 4.9 |
|               | Milli-Q water + 10 mM NaNO <sub>3</sub>   | 4.9 |
|               | Milli-Q water + 100 mM NaNO <sub>3</sub>  | 6.1 |
| <b>Blank</b>  | Milli-Q water + 2 mg L <sup>-1</sup> NOM  | 4.9 |
|               | Milli-Q water + 10 mg L <sup>-1</sup> NOM | 4.9 |
|               | Acetate buffer (pH = 4.0)                 | 4.9 |
|               | Bicarbonate buffer (pH = 7.0)             | 4.9 |
|               | Milli-Q water + CeO <sub>2</sub> NP       | 4.9 |
| <b>Sample</b> | Precipitation                             | 5.3 |
|               | Diluted paint                             | 7.2 |
|               | Diluted stain                             | 5.5 |

47

48

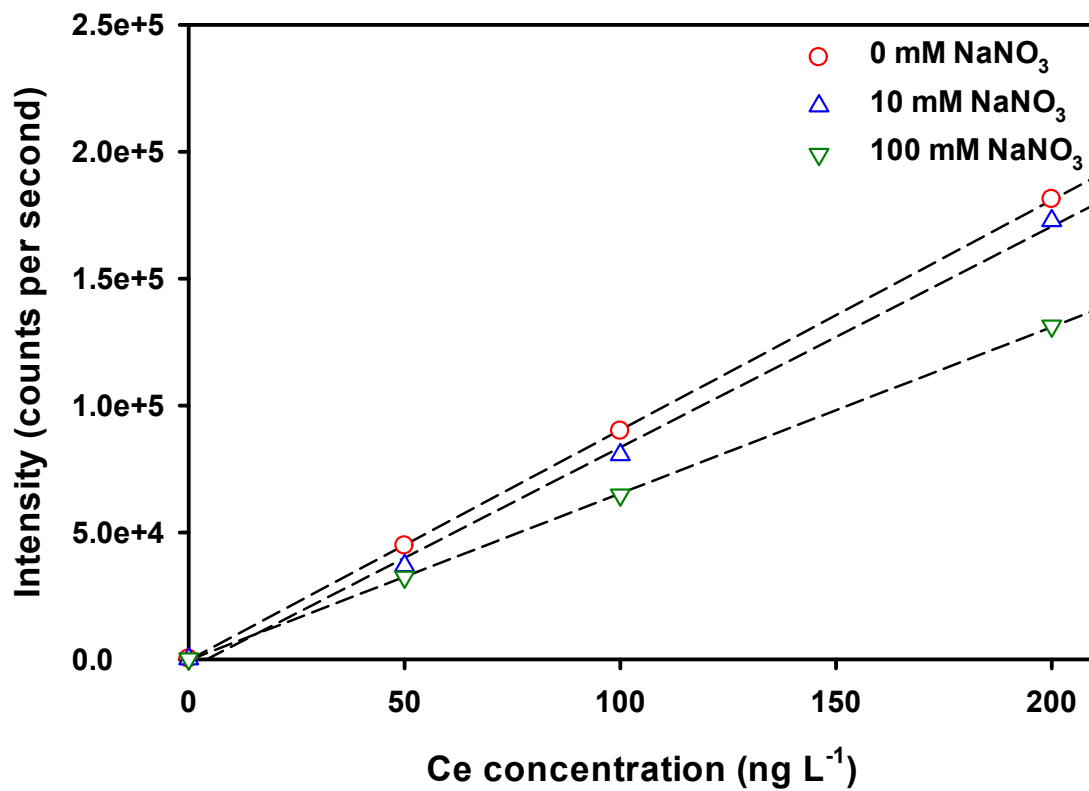

49

50 **Figure S4.** Calibration curves performed using Ce standards with three different concentrations of NaNO<sub>3</sub>.  
51 The measured sensitivities were 863, 811 and 604 cps ng L<sup>-1</sup> for standards obtained in the presence of 0,  
52 10 and 100 mM of NaNO<sub>3</sub>, respectively. Measurements were performed using SP-ICP-MS and a dwell time  
53 of 50 μs.

54

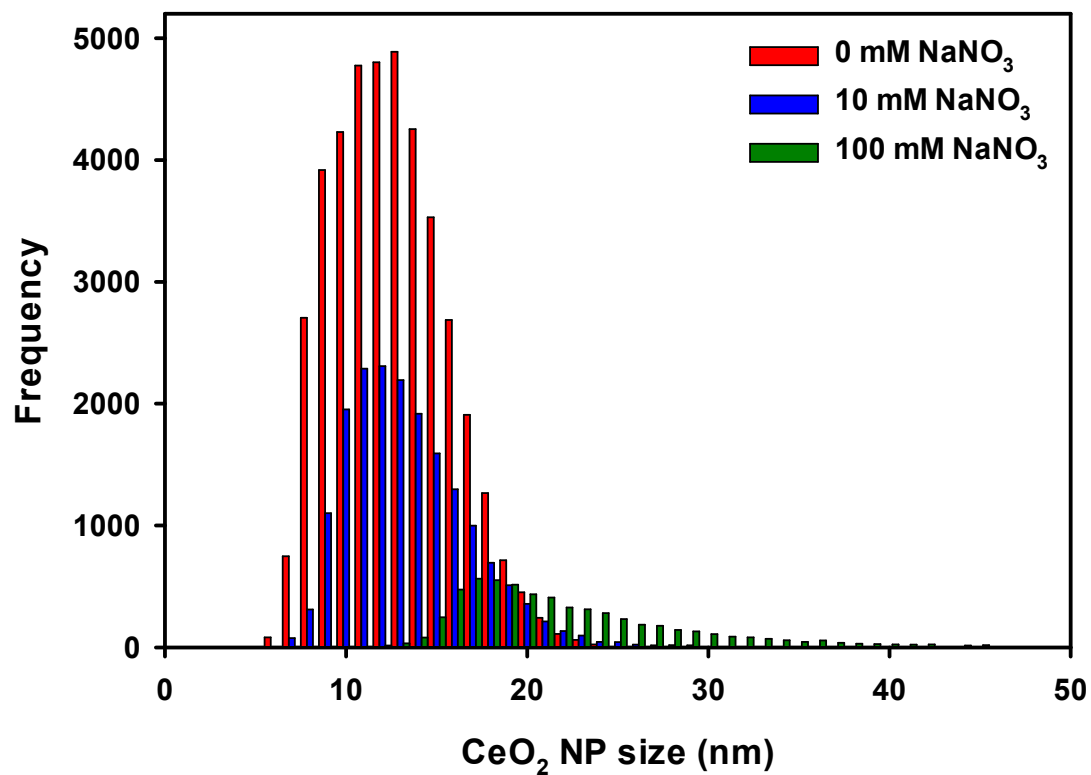

55

56 **Figure S5.** Particle size distribution of CeO<sub>2</sub> NP in a suspension of engineered CeO<sub>2</sub> NP spiked into Milli-Q  
 57 water with three different ionic strengths. Measurements were performed using SP-ICP-MS and a dwell  
 58 time of 50 μs.

59



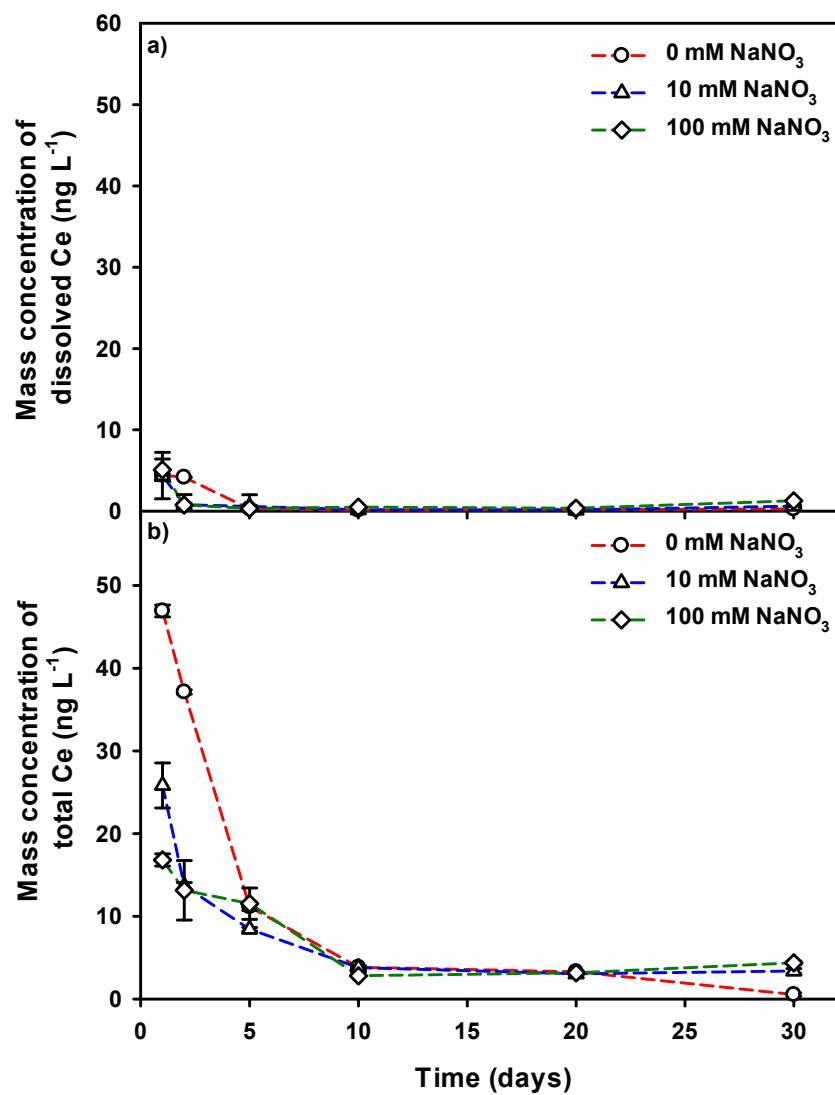

60

61 **Figure S6.** Mass concentrations of **(a)** dissolved and **(b)** total Ce in a suspension of engineered CeO<sub>2</sub> NP,  
 62 spiked into Milli-Q water at three different ionic strengths, as a function of time. Error bars correspond to  
 63 standard deviations obtained from triplicate analysis. Measurements were performed using SP-ICP-MS  
 64 and a dwell time of 50 μs.

65

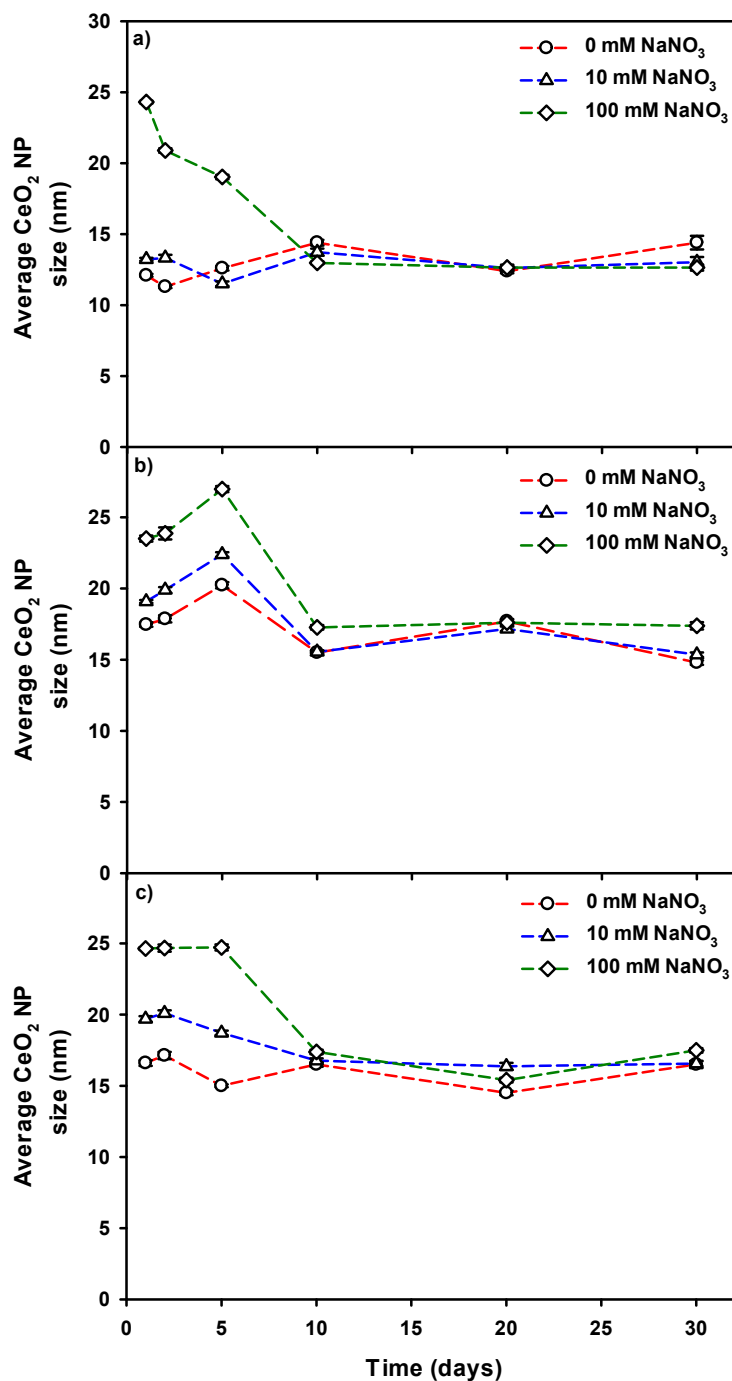

66

67 **Figure S7.** Average CeO<sub>2</sub> NP sizes in **(a)** a suspension of engineered CeO<sub>2</sub> NP, **(b)** paint and **(c)** stain spiked  
 68 into Milli-Q water with three different ionic strengths, as a function of time. Paint and stain were diluted  
 69 2500x. SDL ranged from **(a)** 4.8 to 5.1 nm, **(b)** 7.0 to 7.2 nm, and **(c)** 5.4 to 5.5 nm. NP sizes were calculated  
 70 by assuming that the particles were spherical CeO<sub>2</sub> particles with a density of 7.13 kg. dm<sup>-3</sup>. Error bars  
 71 correspond to standard deviations obtained from triplicate analysis. Measurements were performed  
 72 using SP-ICP-MS and a dwell time of 50 μs.

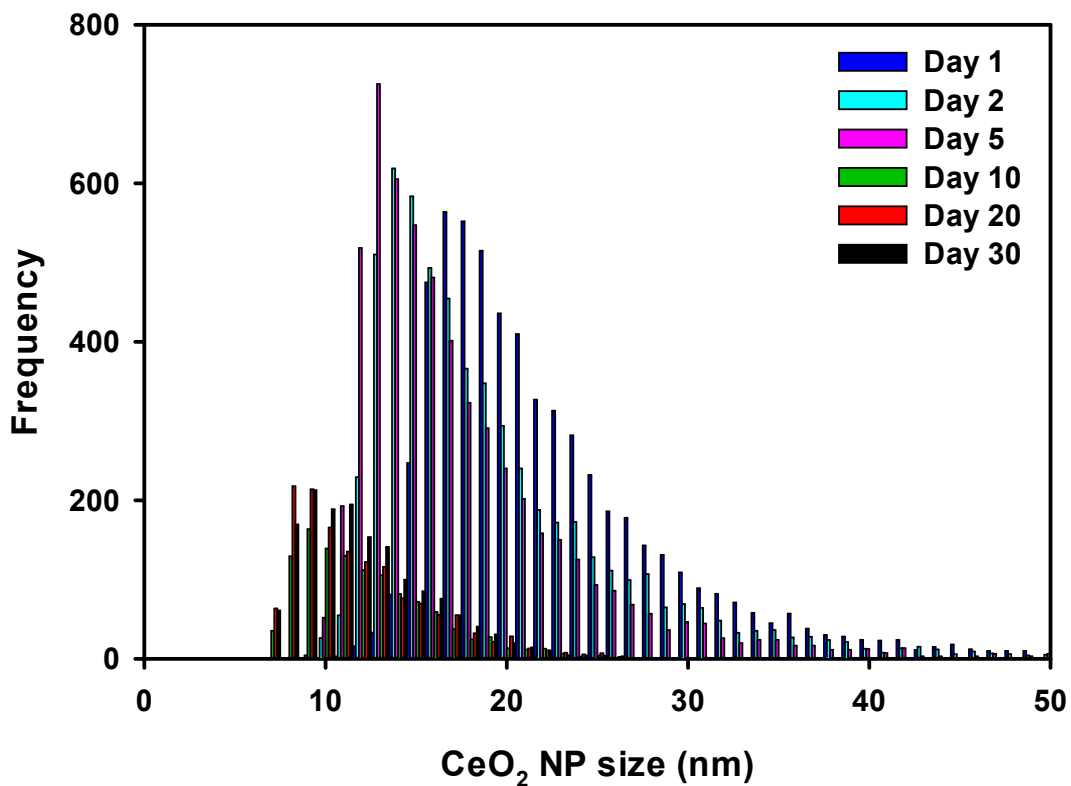

73

74 **Figure S8.** Particle size distributions of CeO<sub>2</sub> NP in a suspension of engineered CeO<sub>2</sub> NP spiked into Milli-Q  
 75 water with 100 mM of NaNO<sub>3</sub>. SDL ranged from 6.1 nm (Day 1) to 6.0 nm (Day 30). Measurements were  
 76 performed using SP-ICP-MS and a dwell time of 50 μs.

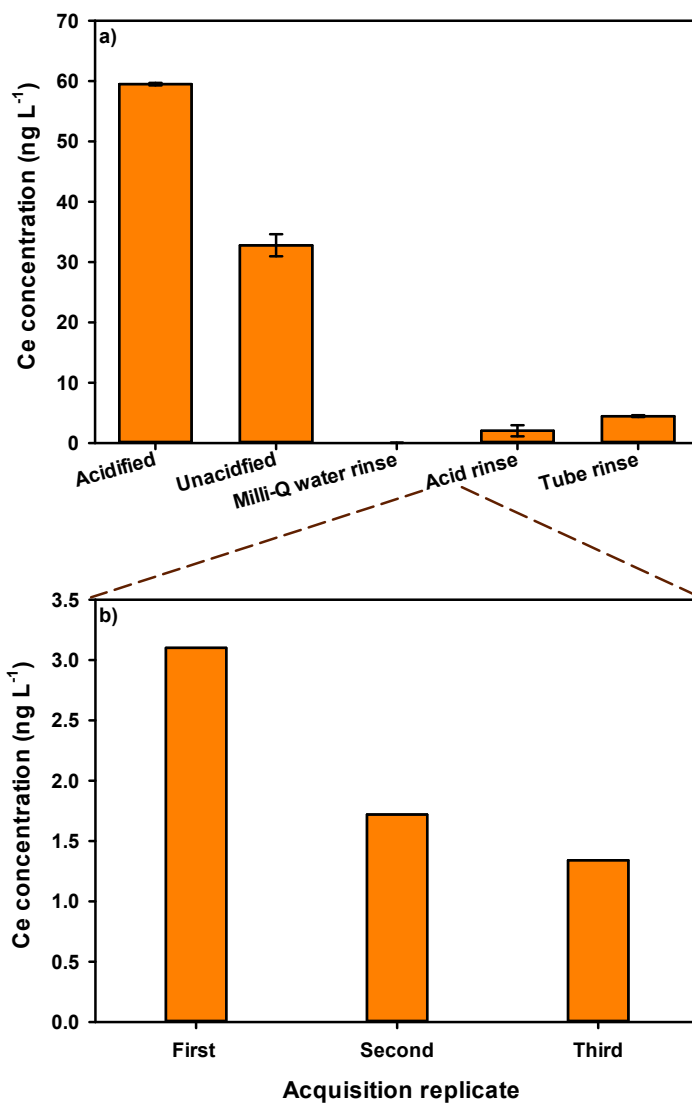

77

78 **Figure S9. (a)** Concentration of dissolved Ce measured in a solution of almost 60 ng L<sup>-1</sup> ionic Ce prepared  
 79 in Milli-Q water without acidification. Adsorptive losses to the ICP-MS and sample tube were evaluated  
 80 by measuring Ce in: (i) a Milli-Q water rinse; (ii) Successive (triplicate) rinses in 2% HNO<sub>3</sub> (Figure S9b) (iii)  
 81 Milli-Q water rinse of the sample tube; (iv) 2% HNO<sub>3</sub> rinse of the sample tube. Measurements were  
 82 performed using SP-ICP-MS and a dwell time of 50 μs.

83

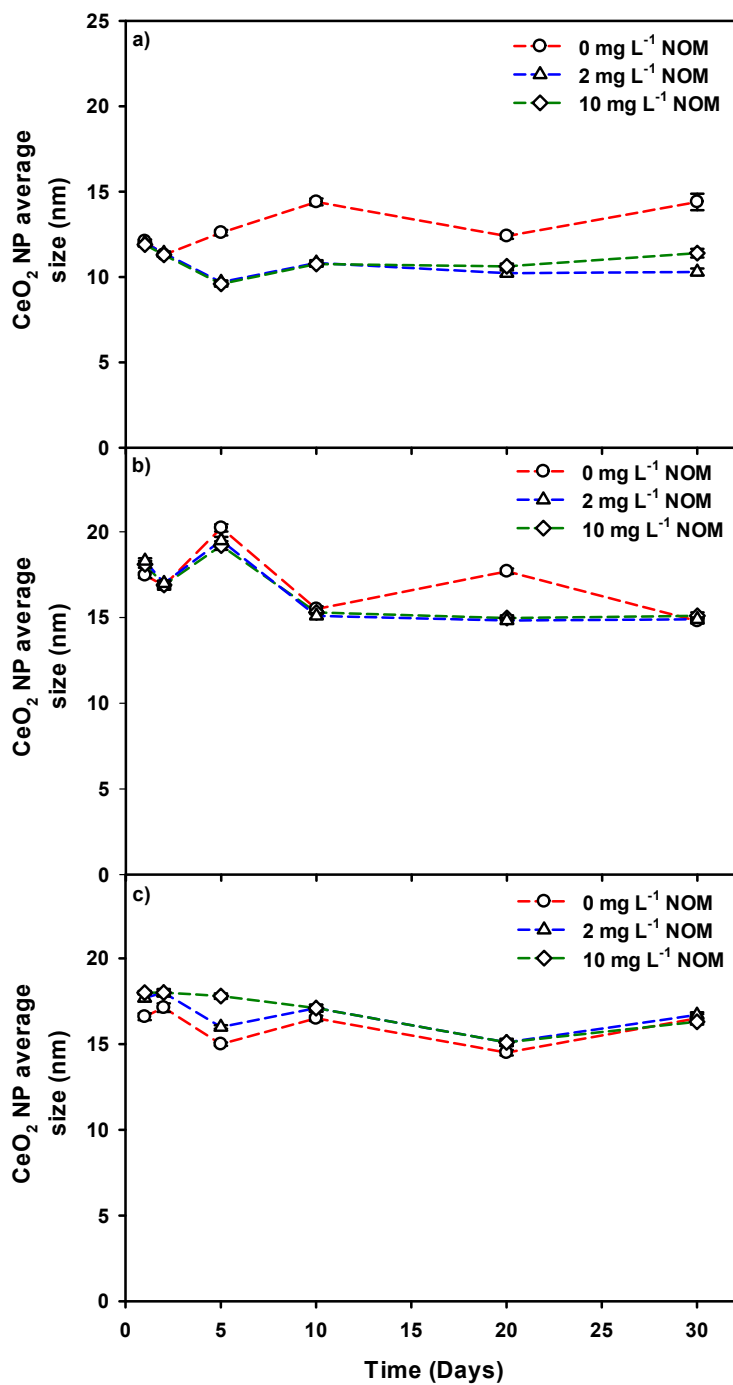

84

85 **Figure S10.** Average CeO<sub>2</sub> NP sizes in (a) a suspension of engineered CeO<sub>2</sub> NP, (b) paint and (c) stain spiked  
 86 into Milli-Q water with three different contents of natural organic matter, as a function of time. Paint and  
 87 stain were diluted 2500x. SDL ranged from (a) 4.8 to 5.1 nm, (b) 7.0 to 7.2 nm, and (c) 5.4 to 5.5 nm. NP  
 88 sizes were calculated by assuming that the particles were spherical CeO<sub>2</sub> particles with a density of 7.13  
 89 kg. dm<sup>-3</sup>. Error bars correspond to standard deviations obtained from triplicate analysis. Measurements  
 90 were performed using SP-ICP-MS and a dwell time of 50 μs.

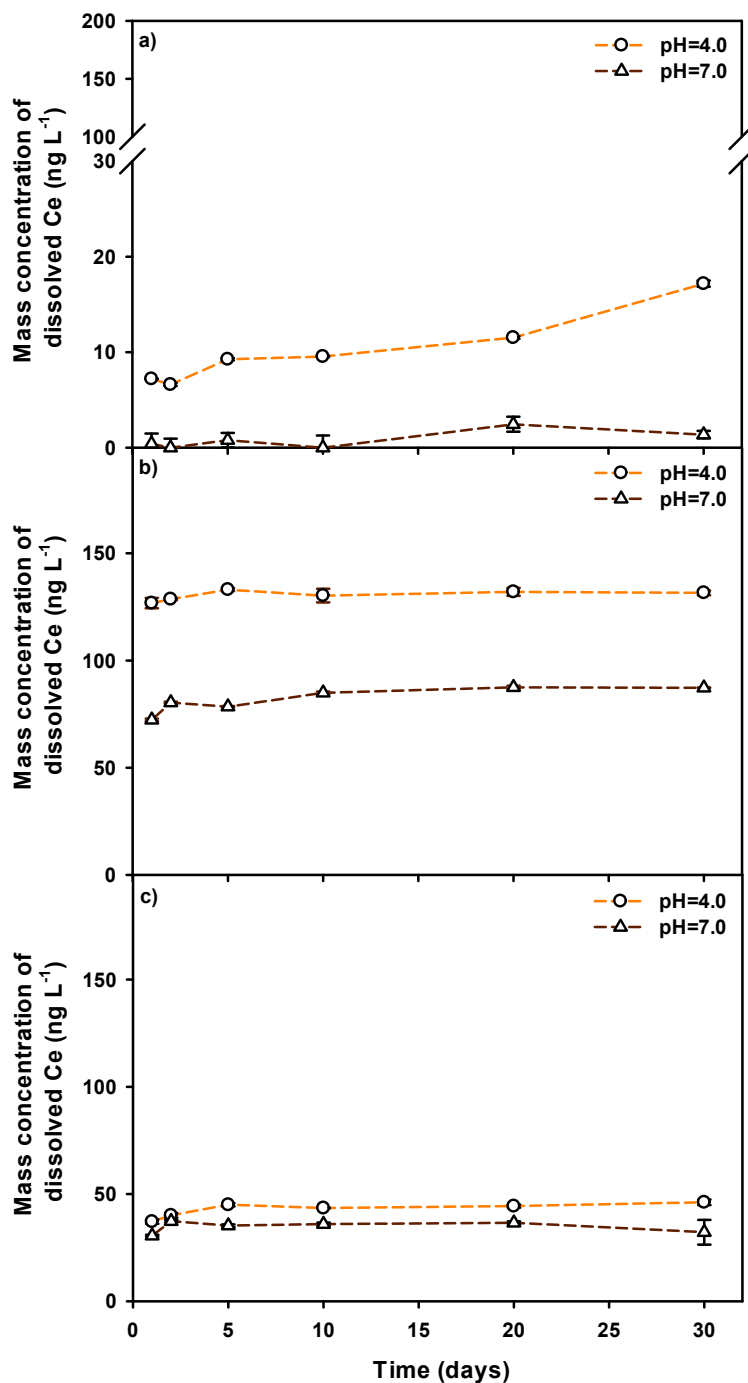

91

92 **Figure S11.** Mass concentration of dissolved Ce in **(a)** engineered CeO<sub>2</sub> NP, **(b)** paint and **(c)** stain spiked  
 93 into acetate buffer with pH = 4.0 or bicarbonate buffer with pH = 7.0, as a function of time. Paint and stain  
 94 were diluted 2500x. SDL ranged from **(a)** 4.8 to 5.1 nm, **(b)** 7.0 to 7.2 nm, and **(c)** 5.4 to 5.5 nm. Error bars  
 95 correspond to standard deviations obtained from triplicate analysis. Measurements were performed  
 96 using SP-ICP-MS and a dwell time of 50 μs.

97

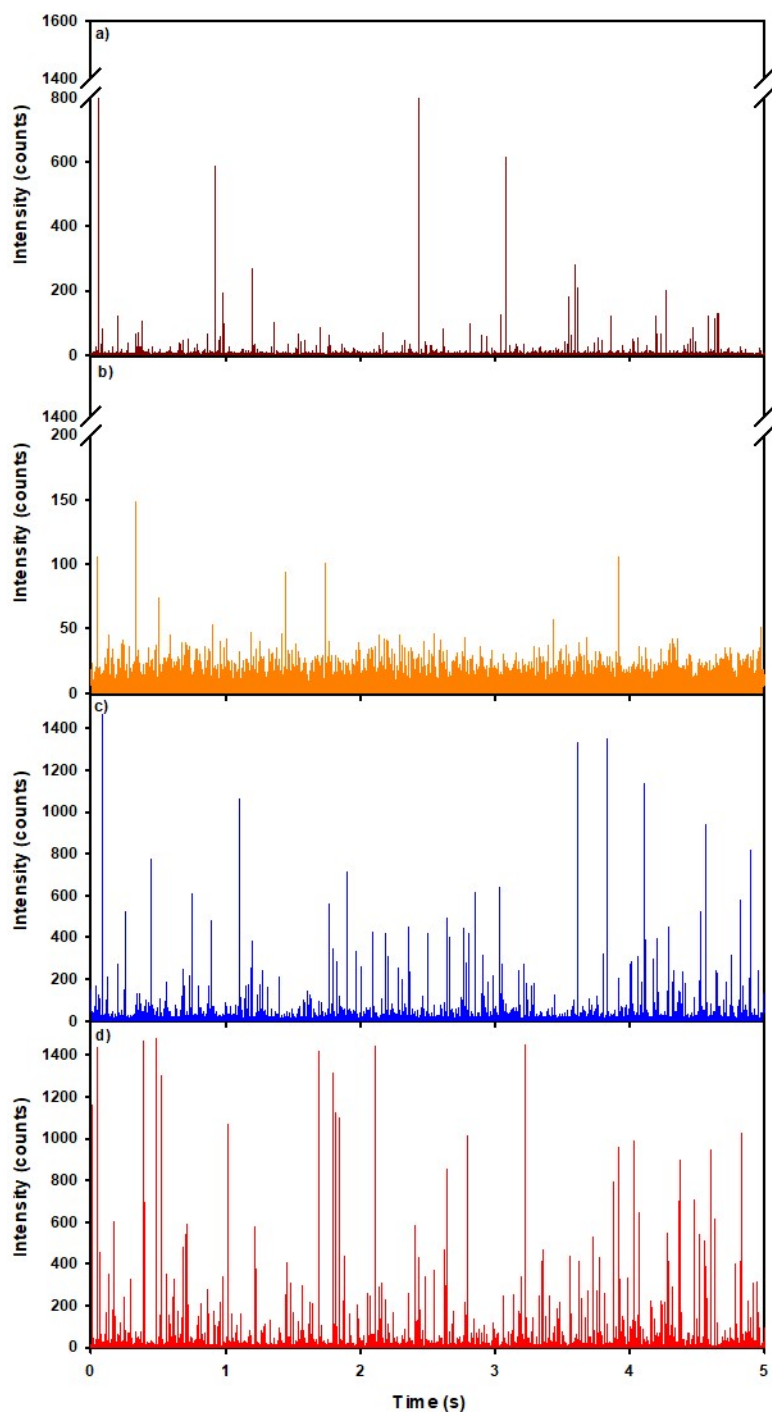

98

99 **Figure S12.** Time resolved signal for  $^{140}\text{Ce}$  in the precipitation **(a)** unspiked; or spiked with **(b)** engineered  
 100  $\text{CeO}_2$  NP, **(c)** paint and **(d)** stain.  $\text{CeO}_2$  NP, paint and stain were spiked in the precipitation. For better  
 101 readability, only 5 s of data collection were shown, the total acquisition time was 50 s. Measurements  
 102 were obtained using SP-ICP-MS with a 50  $\mu\text{s}$  dwell time.

103

104 **Table S3.** pH and concentrations of major elements, including total organic carbon (TOC), in an unfiltered  
 105 rainwater.

| Element | Concentration ( $\mu\text{g L}^{-1}$ ) |                   |                  |                  |                 |                 |                  |                  |     | pH               |     |
|---------|----------------------------------------|-------------------|------------------|------------------|-----------------|-----------------|------------------|------------------|-----|------------------|-----|
|         | Al                                     | Ca                | Cu               | Fe               | K               | Mg              | Mn               | Na               | Zn  |                  | TOC |
| Rain    | 4.9 $\pm$<br>0.3                       | 3784 $\pm$<br>170 | 0.4 $\pm$<br>0.0 | 5.1 $\pm$<br>0.1 | 221 $\pm$<br>11 | 914 $\pm$<br>38 | 0.5 $\pm$<br>0.0 | 1747 $\pm$<br>79 | <DL | 3040 $\pm$<br>46 | 5.2 |

106

107

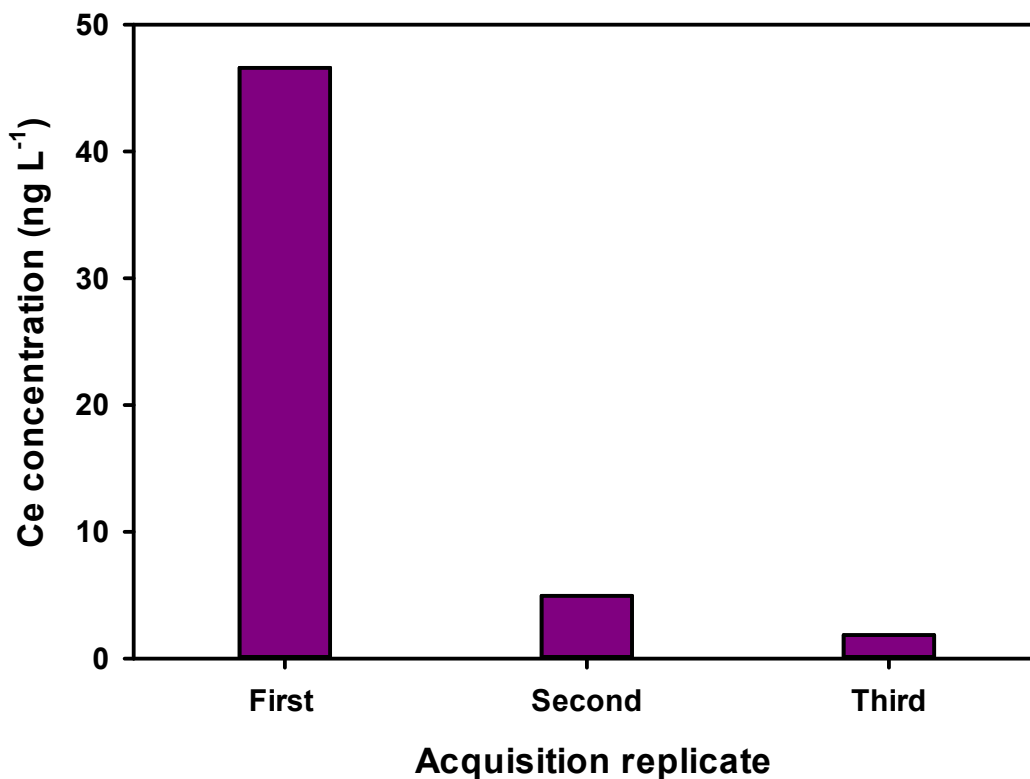

108

109 **Figure S13.** Concentration of dissolved Ce measured in successive (triplicate) rinses in 2% HNO<sub>3</sub> following  
 110 the analysis of an unfiltered precipitation sample. Measurements were performed using SP-ICP-MS and a  
 111 dwell time of 50  $\mu\text{s}$ .

112



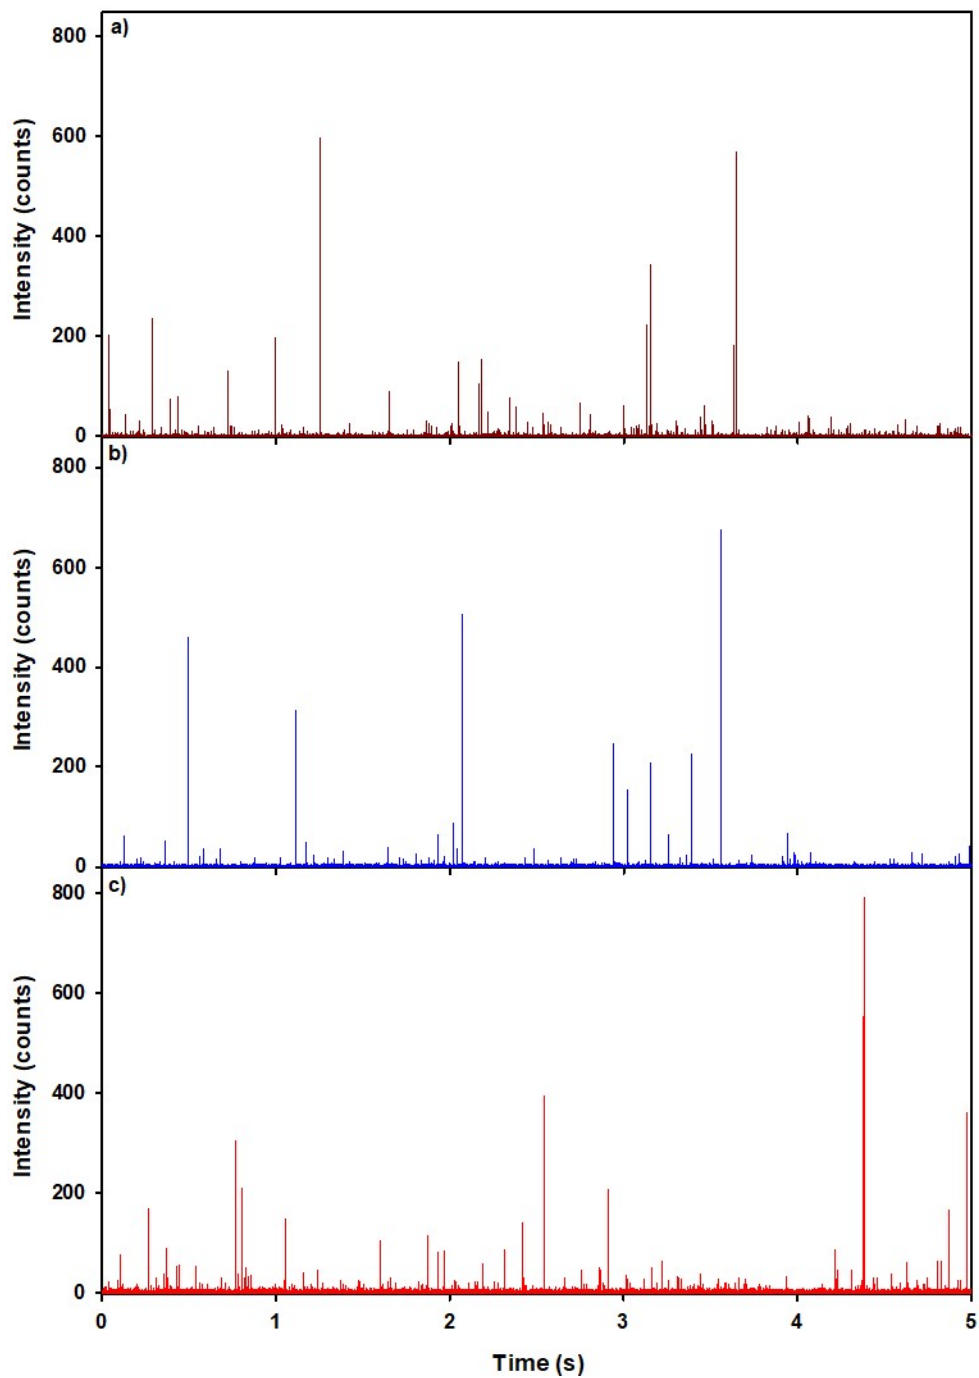

113

114 **Figure S14.** Time resolved signal for  $^{140}\text{Ce}$  in a filtered precipitation **(a)** without, or with contact with a **(b)**  
 115 painted panel, and **(c)** stained panel. For better readability, only 5 s of data collection were shown, the  
 116 total acquisition time was 50 s. Measurements were obtained using SP-ICP-MS with a 50  $\mu\text{s}$  dwell time.

117
